# Supplementary material for: Reactions of two xeric-congeneric species of Centaurea (Asteraceae) to soils with different pH values and iron availability
Source: PeerJ. 2021 Nov 10;9:e12417. doi: 10.7717/peerj.12417 (PMC8590394; doi:10.7717/peerj.12417)
Supplement: Supplemental Information 4 — List of studied parameters follows Wala et al., 2020. [file peerj-09-12417-s004.docx]

**Supplemental Table 2. Parameters derived from the OJIP transient used in this study, formulas of their calculation and definitions.** List of studied parameters follows Wala et al., 2020.

| OJIP parameter | Formula | Definition |
| --- | --- | --- |
| F0 (=FO) | F0=F at 50μs (=F at O-step) | Fluorescence intensity at O-step (at 50 μs) (=Minimal fluorescence intensity) |
| FJ | FJ=F at 2ms (=F at J-step) | Fluorescence intensity at J-step (at 2 ms) |
| FI | FI=F at 60ms (=F at I-step) | Fluorescence intensity at I-step (at 60 ms) |
| FM (=FP) | FM=F at 1s (=F at P-step) | Fluorescence intensity at P-step (at 1000 μs) (=Maximal fluorescence intensity) |
| FV | FV=FM–F0 | Maximal variable fluorescence |
| VJ | VJ=(FJ–F0)/(FM–F0) | Relative variable fluorescence at J‑step (2 ms) |
| VI | VI=(FI–F0)/(FM–F0) | Relative variable fluorescence at I‑step (60 ms) |
| FV/FM | - | Maximum quantum yield of primary PSII photochemistry |
| M0 | M0=TR0/RC–ET0/RC | Approximated initial slope of the fluorescent transient |
| Area | - | Area between fluorescence curve and FM (background subtracted) |
| SM | SM=Area/(FM - F0) | Standardized area above the fluorescence curve between F0 and FM |
| N | N=SM*M0*(1/VJ) | Number of QA redox turnovers until FM is  reached |
| ϕE0 | ϕE0=[1–(F0/FM)]*ψ0 | Quantum yield for electron transport from QA to plastoquinone at t = 0 |
| PIABS | PIABS=γRC/(1−γRC)*ϕP0/(1−ϕP0)*ψ0/(1−ψ0) | Performance index of electron flux from PSII based to intersystem acceptors |
| ABS/RC | ABS/RC=M0*(1/VJ )*(1/ϕP0 ) | Photon flux absorbed by PSII antenna chlorophyll per RC at t = 0 |
| TR0/RC | TR0/RC=M0*(1/VJ) | Trapping flux leading to QA reduction per RC at t = 0 |
| ET0/RC | ET0/RC=M0*(1/VJ )*ψ0 | Electron transport flux per RC at t = 0 |
| DI0/RC | DI0/RC=(ABS/RC)–(TR0/RC) | Dissipated energy flux per RC at t = 0 |
