# Supplementary material for: Reactions of two xeric-congeneric species of Centaurea (Asteraceae) to soils with different pH values and iron availability
Source: PeerJ. 2021 Nov 10;9:e12417. doi: 10.7717/peerj.12417 (PMC8590394; doi:10.7717/peerj.12417)
Supplement: Supplemental Information 6 — Growth, OJIP, chlorosis and elemental analyses. [file peerj-09-12417-s006.xlsx]

## Sheet: Growth
	Variant	Root FW [g]		Root DW [mg]		Shoot FW [g]		Shoot DW [mg]		FW S:R ratio [a.u.]		DW S:R ratio [a.u.]		Leaf FW [g]						Leaf DW [mg]						Leaf number [count]		LDMC [mg DW g^-1 FW]						Leaf area [cm^2]						SLA [cm^2 g^-1 DW]
		Csc	Cst	Csc	Cst	Csc	Cst	Csc	Cst	Csc	Cst	Csc	Cst	Csc		Cst				Csc		Cst				Csc	Cst	Csc		Cst				Csc		Cst				Csc		Cst
	p	5.959	1.637	1407	313	6.053	3.13	1000	516	1.01577	1.91203	0.710732	1.64856	0.401	0.535	0.196	0.144	0.187	0.157	66	99	36	34	42	30	20	17	164.589	185.047	183.673	236.111	224.599	191.083	11.7	15.49	8.02	6.48	7.89	7.14	177.273	156.465	222.778	190.588	187.857	238
	p	3.333	3.493	918	881	2.162	3.548	417	704	0.648665	1.01575	0.454248	0.799092	0.297	0.385	0.252	0.273	0.212	0.191	61	81	56	62	45	42	7	20	205.387	210.39	222.222	227.106	212.264	219.895	9.21	13.79	9.27	9.26	7.65	7.13	150.984	170.247	165.536	149.355	170	169.762
	p	3.311	2.388	848	513	1.702	3.516	280	599	0.514044	1.47236	0.330189	1.16764	0.206	0.189	0.18	0.175	0.166	0.131	35	31	38	38	38	25	9	20	169.903	164.021	211.111	217.143	228.916	190.84	8.05	7.73	6.44	7.14	6.88	5.09	230	249.355	169.474	187.895	181.053	203.6
	p	2.177	1.92	610	420	1.889	2.53	322	394	0.867708	1.31771	0.527869	0.938095	0.335	0.401	0.111	0.142	0.134	0.141	58	71	20	25	23	24	8	18	173.134	177.057	180.18	176.056	171.642	170.213	12.88	13.93	4.23	5.68	5.09	5.55	222.069	196.197	211.5	227.2	221.304	231.25
	r	3.26	1.137	1038	232	2.321	2.546	426	459	0.711963	2.23923	0.410405	1.97845	0.318	0.412	0.182	0.178	0.214	0.193	51	77	35	34	41	39	8	17	160.377	186.893	192.308	191.011	191.589	202.073	9.54	12.31	7.4	7.13	7.95	7.31	187.059	159.87	211.429	209.706	193.902	187.436
	r	2.082	1.453	602	326	3.15	3.296	517	577	1.51297	2.26841	0.858804	1.76994	0.573	0.364	0.185	0.136	0.187	0.186	95	60	36	26	36	37	10	17	165.794	164.835	194.595	191.176	192.513	198.925	17.46	13.43	7.87	5.83	7.99	7.28	183.789	223.833	218.611	224.231	221.944	196.757
	r	2.001	1.136	575	244	1.877	1.741	341	300	0.938031	1.53257	0.593043	1.22951	0.434	0.329	0.212	0.183	0.144	0.191	84	59	34	34	32	36	8	11	193.548	179.331	160.377	185.792	222.222	188.482	14.45	11.54	8.67	7.44	5.96	7.85	172.024	195.593	255	218.824	186.25	218.056
	r	4.07	1.152	1191	260	3.601	2.141	693	401	0.884767	1.85851	0.581864	1.54231	0.587	0.521	0.204	0.164	0.139	0.165	103	102	36	31	31	32	9	15	175.468	195.777	176.471	189.024	223.022	193.939	21.61	18.02	8.24	6.85	6.19	6.33	209.806	176.667	228.889	220.968	199.677	197.812
	r5	3.504	1.894	984	383	2.04	1.583	389	291	0.582192	0.835797	0.395325	0.759791	0.445	0.422	0.108	0.141	0.128	0.117	91	74	24	28	24	23	6	14	204.494	175.355	222.222	198.582	187.5	196.581	16.79	16.01	4.95	6.09	5.61	5.24	184.505	216.351	206.25	217.5	233.75	227.826
	r5	3.221	2.306	931	423	3.663	3.797	623	663	1.13722	1.64657	0.669173	1.56738	0.565	0.453	0.171	0.291	0.273	0.245	93	73	33	50	50	49	11	16	164.602	161.148	192.982	171.821	183.15	200	18.88	13.71	7.31	10.01	10.49	8.82	203.011	187.808	221.515	200.2	209.8	180
	r5	2.364	2.957	702	702	2.31	4.369	461	829	0.977157	1.47751	0.656695	1.18091	0.318	0.298	0.259	0.287	0.267	0.276	65	60	51	53	52	51	11	17	204.403	201.342	196.911	184.669	194.757	184.783	10	10.2	11.58	11.71	11.38	12.22	153.846	170	227.059	220.943	218.846	239.608
	r5	1.631	1.912	467	389	2.168	2.653	372	420	1.32925	1.38755	0.796574	1.07969	0.372	0.451	0.191	0.195	0.172	0.166	60	84	28	33	28	29	8	17	161.29	186.253	146.597	169.231	162.791	174.699	12.34	13.02	8.31	7.24	7.06	7	205.667	155	296.786	219.394	252.143	241.379
	r25	2.55	3.018	699	624	1.721	3.888	302	683	0.674902	1.28827	0.432046	1.09455	0.213	0.215	0.24	0.235	0.199	0.23	37	50	47	44	36	43	7	18	173.709	232.558	195.833	187.234	180.905	186.957	8.46	7.67	8.75	9.44	8.32	9.09	228.649	153.4	186.17	214.545	231.111	211.395
	r25	1.309	2.436	417	613	1.297	5.612	285	962	0.990833	2.30378	0.683453	1.56933	0.351	0.467	0.342	0.269	0.277	0.261	63	82	62	51	55	48	7	21	179.487	175.589	181.287	189.591	198.556	183.908	12.5	14.82	13.18	10.55	9.85	10.45	198.413	180.732	212.581	206.863	179.091	217.708
	r25	2.571	2.564	715	556	1.693	3.731	256	590	0.658499	1.45515	0.358042	1.06115	0.367	0.52	0.292	0.302	0.282	0.266	48	84	43	48	50	47	4	15	130.79	161.538	147.26	158.94	177.305	176.692	12.14	16.23	11.58	12.66	10.86	10.85	252.917	193.214	269.302	263.75	217.2	230.851
	r25	2.805	3.775	884	904	2.357	4.657	433	856	0.840285	1.23364	0.489819	0.946903	0.309	0.593	0.305	0.345	0.351	0.329	48	101	73	75	65	67	7	18	155.34	170.32	239.344	217.391	185.185	203.647	12.77	25.18	11.05	13.04	13.15	13.24	266.042	249.307	151.37	173.867	202.308	197.612
		Description of experimental variants, parameters and units of measurements follows abbreviations presented in the main body of the manuscript.
		Datasheet 1. Raw data of growth parameters measured in the study.

## Sheet: OJIP
			Parameter [a.u.]
	Species	Variant	N	Fv/Fm	F0	FJ	FI	FM	FV	SM	area	Mo	VI	VJ	ABS/RC	TR0/RC	ET0/RC	DI0/RC	PhiE0	PIABS
	Csc	p	677.937	0.784	10176	25229	36705	47206	37030	329.704	12208926	0.836	0.716	0.407	2.621	2.056	1.22	0.565	0.466	2.027
	Csc	p	673.223	0.801	9331	25066	34884	46881	37550	345.189	12961858	0.817	0.681	0.419	2.435	1.95	1.133	0.485	0.465	2.291
	Csc	p	681.792	0.816	8876	24058	36445	48181	39305	363.498	14287294	0.724	0.701	0.386	2.299	1.876	1.151	0.424	0.501	3.06
	Csc	p	703.403	0.815	8681	20482	32674	46848	38167	358.661	13689019	0.606	0.629	0.309	2.407	1.961	1.355	0.446	0.563	4.081
	Csc	p	705.14	0.812	8063	22433	30853	42817	34754	374.625	13019722	0.778	0.656	0.413	2.319	1.882	1.104	0.437	0.476	2.637
	Csc	p	723.325	0.79	8908	22952	30853	42426	33518	350.289	11740988	0.865	0.655	0.419	2.614	2.065	1.2	0.549	0.459	1.996
	Csc	p	784.53	0.806	9461	22660	35827	48767	39306	392.235	15417199	0.672	0.671	0.336	2.482	2	1.328	0.481	0.535	3.311
	Csc	p	708.791	0.816	9298	23375	37127	50554	41256	363.617	15001378	0.665	0.675	0.341	2.389	1.949	1.284	0.439	0.538	3.587
	Csc	r	559.507	0.798	7738	19962	26822	38396	30658	293.84	9008540	0.759	0.622	0.399	2.385	1.904	1.145	0.481	0.48	2.505
	Csc	r	667.342	0.803	7900	19929	28902	40184	32284	342.937	11071364	0.725	0.651	0.373	2.422	1.946	1.221	0.476	0.504	2.841
	Csc	r	752.315	0.793	8941	22075	31861	43240	34299	360.144	12352576	0.8	0.668	0.383	2.633	2.089	1.289	0.545	0.489	2.347
	Csc	r	694.099	0.808	8615	22595	31926	44898	36283	340.713	12362089	0.785	0.642	0.385	2.521	2.037	1.252	0.484	0.497	2.665
	Csc	r	853.448	0.805	10144	26822	38688	51920	41776	396.573	16567241	0.859	0.683	0.399	2.675	2.152	1.293	0.523	0.483	2.317
	Csc	r	768.289	0.808	9363	23700	32738	48831	39468	360.437	14225742	0.774	0.592	0.363	2.637	2.132	1.357	0.506	0.515	2.802
	Csc	r	661.43	0.796	11281	26919	42817	55236	43955	314.352	13817342	0.749	0.717	0.356	2.644	2.104	1.356	0.54	0.513	2.668
	Csc	r	560.216	0.792	8973	22953	33551	43045	34072	274.994	9369588	0.836	0.721	0.41	2.574	2.037	1.201	0.537	0.467	2.12
	Csc	r5	703.396	0.786	9525	21067	32283	44605	35080	333.824	11710536	0.693	0.649	0.329	2.679	2.107	1.414	0.572	0.528	2.803
	Csc	r5	731.004	0.814	8713	23148	32739	46913	38200	363.864	13899596	0.759	0.629	0.378	2.467	2.009	1.25	0.458	0.507	2.926
	Csc	r5	685.782	0.787	9590	25163	32446	45060	35470	325.878	11558896	0.924	0.644	0.439	2.673	2.104	1.18	0.569	0.442	1.768
	Csc	r5	645.829	0.794	8681	21717	31341	42167	33486	311.262	10422929	0.808	0.677	0.389	2.613	2.075	1.267	0.538	0.485	2.316
	Csc	r5	529.902	0.778	7705	19052	25261	34722	27017	278.525	7524907	0.799	0.65	0.42	2.445	1.903	1.103	0.543	0.451	1.98
	Csc	r5	658.312	0.781	8322	20189	27309	37972	29650	328.243	9732418	0.803	0.64	0.4	2.568	2.006	1.203	0.563	0.468	2.079
	Csc	r5	705.361	0.773	10599	26106	35567	46653	36054	323.496	11663318	0.938	0.693	0.43	2.821	2.18	1.243	0.641	0.44	1.597
	Csc	r5	585.017	0.796	8387	21099	29747	41159	32772	296.284	9709824	0.766	0.652	0.388	2.48	1.975	1.209	0.505	0.487	2.487
	Csc	r25	721.217	0.788	9005	25423	29585	42556	33551	355.669	11933059	0.992	0.613	0.489	2.572	2.028	1.035	0.544	0.403	1.512
	Csc	r25	577.804	0.803	8420	21425	29878	42752	34332	284.634	9772067	0.769	0.625	0.379	2.528	2.03	1.261	0.498	0.499	2.645
	Csc	r25	589.332	0.784	9331	25781	30788	43240	33909	281.327	9539505	1.016	0.633	0.485	2.671	2.095	1.079	0.576	0.404	1.444
	Csc	r25	750.716	0.781	10729	25489	33812	48897	38168	316.769	12090426	0.916	0.605	0.387	3.036	2.37	1.453	0.666	0.479	1.858
	Csc	r25	725.428	0.782	9135	22627	28609	41939	32804	327.209	10733756	0.912	0.594	0.411	2.834	2.217	1.305	0.617	0.46	1.813
	Csc	r25	747.453	0.801	8453	23278	29748	42459	34006	370.502	12599307	0.879	0.626	0.436	2.519	2.017	1.138	0.501	0.452	2.066
	Csc	r25	760.02	0.777	8908	21847	27829	39989	31081	378.11	11752048	0.837	0.609	0.416	2.586	2.01	1.173	0.576	0.454	1.892
	Csc	r25	831.027	0.787	9525	24383	30397	44637	35112	376.767	13229032	0.933	0.594	0.423	2.804	2.206	1.272	0.598	0.454	1.792
	Cst	p	775.016	0.796	8452	21197	30397	41484	33032	387.478	12799162	0.772	0.664	0.386	2.512	2	1.228	0.512	0.489	2.477
	Cst	p	653.936	0.782	8680	22855	29259	39826	31146	318.235	9911743	0.935	0.661	0.455	2.628	2.055	1.12	0.573	0.426	1.635
	Cst	p	760.017	0.814	8452	21879	32803	45482	37030	379.077	14037214	0.727	0.658	0.363	2.463	2.005	1.278	0.458	0.519	3.128
	Cst	p	798.068	0.798	8615	21457	30333	42687	34072	375.249	12785477	0.802	0.637	0.377	2.665	2.127	1.325	0.538	0.497	2.454
	Cst	p	732.534	0.789	9363	24025	30560	44280	34917	341.312	11917607	0.901	0.607	0.42	2.722	2.146	1.245	0.576	0.457	1.893
	Cst	p	961.205	0.79	9395	23342	30072	44670	35275	427.758	15089150	0.888	0.586	0.395	2.846	2.247	1.359	0.598	0.477	2.018
	Cst	p	923.663	0.79	9818	24708	33746	46783	36965	418.035	15452650	0.89	0.647	0.403	2.796	2.21	1.32	0.587	0.472	1.996
	Cst	p	1052.06	0.769	10891	27569	34299	47173	36282	431.071	15640133	1.122	0.645	0.46	3.173	2.441	1.319	0.733	0.416	1.234
	Cst	r	628.365	0.805	8518	22140	31503	43792	35274	317.964	11215851	0.763	0.652	0.386	2.453	1.976	1.213	0.477	0.494	2.683
	Cst	r	719.37	0.798	7900	20677	26984	39046	31146	356.975	11118343	0.827	0.613	0.41	2.526	2.015	1.188	0.511	0.47	2.244
	Cst	r	747.93	0.805	9136	26367	35892	46913	37777	372.559	14074180	0.916	0.708	0.456	2.493	2.008	1.092	0.486	0.438	1.978
	Cst	r	743.31	0.797	8615	22693	31081	42394	33779	374.26	12642144	0.828	0.665	0.417	2.493	1.986	1.158	0.507	0.465	2.201
	Cst	r	666.034	0.802	9266	24286	35014	46718	37452	321.873	12054804	0.83	0.687	0.401	2.581	2.069	1.239	0.512	0.48	2.339
	Cst	r	743.79	0.795	9526	26139	34397	46393	36867	351.919	12974198	0.952	0.675	0.451	2.66	2.114	1.161	0.546	0.437	1.774
	Cst	r	836.615	0.807	9363	25164	34754	48441	39078	383.57	14989139	0.882	0.65	0.404	2.704	2.181	1.299	0.523	0.481	2.274
	Cst	r	916.796	0.79	9201	24936	32088	43825	34624	441.966	15302648	0.943	0.661	0.454	2.626	2.074	1.132	0.551	0.431	1.721
	Cst	r5	568.315	0.81	9753	25001	39208	51205	41452	275.345	11413621	0.759	0.711	0.368	2.55	2.064	1.305	0.486	0.512	2.865
	Cst	r5	614.717	0.793	8778	24968	31568	42329	33551	317.558	10654383	0.934	0.679	0.483	2.442	1.936	1.002	0.506	0.41	1.678
	Cst	r5	647.736	0.779	8810	24675	28609	39858	31048	334.821	10395535	0.989	0.638	0.511	2.484	1.935	0.946	0.549	0.381	1.358
	Cst	r5	600.744	0.762	9038	24545	29585	38037	28999	294.802	8548958	1.09	0.709	0.535	2.673	2.038	0.948	0.635	0.355	1.044
	Cst	r5	747.471	0.786	9461	24481	32869	44215	34754	358.233	12450026	0.902	0.674	0.432	2.655	2.087	1.185	0.568	0.446	1.818
	Cst	r5	569.34	0.785	9428	23993	32413	43759	34331	270.218	9276839	0.894	0.67	0.424	2.686	2.107	1.213	0.579	0.452	1.84
	Cst	r5	726.088	0.778	9948	26659	33388	44832	34884	325.08	11340445	1.07	0.672	0.479	2.87	2.233	1.164	0.637	0.405	1.329
	Cst	r5	747.206	0.778	10273	27016	35144	46360	36087	327.225	11808572	1.059	0.689	0.464	2.934	2.283	1.224	0.65	0.417	1.384
	Cst	r25	609.905	0.794	9525	24610	34721	46230	36705	279.614	10263224	0.896	0.686	0.411	2.747	2.181	1.285	0.566	0.468	2.01
	Cst	r25	725.565	0.793	9590	25423	34006	46263	36673	341.049	12507272	0.918	0.666	0.432	2.684	2.127	1.209	0.556	0.45	1.875
	Cst	r25	754.196	0.776	9103	24123	29227	40606	31503	359.985	11340622	0.999	0.639	0.477	2.7	2.095	1.096	0.605	0.406	1.406
	Cst	r25	727.504	0.774	9688	25716	30625	42784	33096	337.085	11156154	1.045	0.633	0.484	2.79	2.158	1.113	0.632	0.399	1.304
	Cst	r25	801.428	0.808	9233	24675	35274	48051	38818	383.765	14896986	0.831	0.671	0.398	2.585	2.088	1.258	0.497	0.486	2.462
	Cst	r25	931.48	0.786	8517	21424	28414	39858	31341	476.483	14933442	0.805	0.635	0.412	2.486	1.955	1.15	0.531	0.462	2.114
	Cst	r25	670.726	0.784	9168	24090	32348	42361	33193	320.705	10645173	0.94	0.698	0.45	2.669	2.091	1.151	0.578	0.431	1.661
	Cst	r25	699.876	0.785	9786	26822	34429	45613	35827	333.419	11945420	0.998	0.688	0.476	2.672	2.099	1.101	0.573	0.412	1.511
			Description of experimental variants, parameters and units of measurements follows abbreviations presented in the main body of the manuscript.
			Datasheet 2. Raw data of OJIP traits measured in the study.

## Sheet: Chlorophyll content + chlorosis
		Chlorophyll content [mg m^-2]				IDC score [a.u.]
	Variant	Csc	Cst			Csc	Cst
	p	427	497		p	1	1
	p	383	472		p	1	1
	p	364	478		p	1	1
	p	338	478		p	1	1
	p	383	338		r	1	1
	p	459	472		r	1	1
	p	459	491		r	1	1
	p	383	465		r	1	1
	p	465	491		r5	1	1
	p	497	535		r5	1	1
	p	497	459		r5	1	1
	p	389	478		r5	1	1
	p	535	478		r25	1	1
	p	516	491		r25	1	1
	p	522	497		r25	1	1
	p	541	459		r25	1	1
	r	389	484
	r	402	484
	r	414	421
	r	472	472
	r	383	491
	r	529	459
	r	491	453
	r	472	459
	r	434	478
	r	421	408
	r	395	478
	r	421	472
	r	478	408
	r	465	459
	r	503	427
	r	541	472
	r5	402	434
	r5	427	421
	r5	370	459
	r5	472	370
	r5	484	453
	r5	453	434
	r5	459	478
	r5	491	478
	r5	427	459
	r5	402	497
	r5	503	453
	r5	522	491
	r5	497	478
	r5	472	459
	r5	453	421
	r5	427	453
	r25	427	491
	r25	497	491
	r25	459	478
	r25	459	472
	r25	491	414
	r25	421	453
	r25	484	431
	r25	434	491
	r25	364	459
	r25	535	389
	r25	453	472
	r25	421	453
	r25	338	497
	r25	516	491
	r25	383	472
	r25	389	478
	Description of experimental variants, parameters and units of measurements follows abbreviations presented in the main body of the manuscript.
	Datasheet 3. Raw data of chlorophyll content and chlorosis scores measured in the study.

## Sheet: Elemental composition
		Content of element												Fe:Mn ratio					SAP
		Csc						Cst						[a.u.]					[%]
		Ca	Mg	Fe	Mn	Zn	Cu	Ca	Mg	Fe	Mn	Zn	Cu						Csc						Cst
		[mg g^-1 DW]	[mg g^-1 DW]	[mg g^-1 DW]	[mg g^-1 DW]	[mg g^-1 DW]	[µg g^-1 DW]	[mg g^-1 DW]	[mg g^-1 DW]	[mg g^-1 DW]	[mg g^-1 DW]	[mg g^-1 DW]	[µg g^-1 DW]	Csc	Cst				Ca	Mg	Fe	Mn	Zn	Cu	Ca	Mg	Fe	Mn	Zn	Cu
p	root	2.17977	3.52118	0.288479	0.0101507	0.0744996	10.3035	1.75543	2.8477	0.320933	0.00832907	0.0708498	11.0323	27.9566	37.9038			p	0.974846	0.725041	0.433888	0.804346	0.577042	0.257021	0.93945	0.523446	0.316745	0.725166	0.471915	0.386689
p	root	2.02032	2.73366	0.180338	0.0102179	0.0895207	13.2989	0.876844	2.56413	0.228729	0.0101816	0.065857	7.13871	17.3617	22.0988			p	0.977235	0.792586	0.563904	0.831978	0.601012	0.293681	0.97949	0.630354	0.372007	0.812202	0.493465	0.416334
p	root	3.07083	4.00142	0.280259	0.0100637	0.0819929	6.207	1.42821	2.84825	0.229611	0.0106226	0.081537	8.85058	27.3949	21.2632			p	0.96501	0.611916	0.52548	0.751817	0.787489	0.410849	0.970209	0.647434	0.315326	0.767143	0.365855	0.346889
p	root	1.38639	2.12459	0.287213	0.0104754	0.0732295	6.72836	1.5156	2.67905	0.161917	0.0088381	0.0626952	8.19181	26.9711	18.0218			p	0.980233	0.704882	0.443823	0.647649	0.69281	0.323071	0.957274	0.547519	0.460279	0.725372	0.469625	0.285283
p	shoot	84.4767	9.285	0.2211	0.04173	0.10164	3.5643	27.236	3.12791	0.148779	0.0219767	0.063314	6.95581	5.21202	6.65954			r	0.943407	0.646756	0.349378	0.496621	0.643389	0.414992	0.909327	0.467291	0.175075	0.31775	0.345434	0.242104
p	shoot	86.728	10.446	0.233189	0.0505947	0.134849	5.52954	41.8747	4.37259	0.135493	0.0440341	0.0641577	5.0921	4.53387	3.02686			r	0.955027	0.746273	0.41202	0.573398	0.748882	0.394592	0.908408	0.530513	0.274934	0.460162	0.437617	0.376036
p	shoot	84.6914	6.30929	0.310357	0.0304857	0.303836	4.3285	46.5124	5.23038	0.105747	0.0349958	0.0470409	4.70083	10.0145	2.97247			r	0.939994	0.561972	0.307988	0.532683	0.622405	0.502149	0.82938	0.463758	0.186993	0.331594	0.322283	0.424224
p	shoot	68.7509	5.07453	0.229193	0.0192547	0.165155	3.21118	33.9567	3.24175	0.138084	0.0233439	0.055514	3.2698	11.7093	5.81881			r	0.955768	0.532315	0.383593	0.607842	0.577901	0.45082	0.88274	0.448377	0.340757	0.542014	0.37145	0.400333
r	root	5.2497	1.45968	0.597225	0.0361734	0.0754118	5.0925	4.62461	2.5281	0.961267	0.0444957	0.11625	13.1803	16.2411	21.2516			r5	0.933187	0.48078	0.376238	0.547139	0.720839	0.336343	0.828293	0.444019	0.198366	0.529912	0.297454	0.292135
r	root	3.3454	1.16163	0.458372	0.0247575	0.0823455	8.10942	3.12055	1.82577	0.524632	0.0204294	0.0888037	8.98528	18.2128	25.2618			r5	0.943623	0.603967	0.41303	0.672552	0.726515	0.416389	0.806994	0.409316	0.114669	0.310588	0.324983	0.399076
r	root	4.36037	1.9413	0.534574	0.0196991	0.114557	7.22615	6.9823	2.91541	1.09757	0.0318689	0.14059	8.08393	26.6948	33.8792			r5	0.920594	0.474922	0.263855	0.639065	0.671837	0.328793	0.900831	0.50936	0.291496	0.497873	0.369413	0.363771
r	root	3.06144	1.64307	0.376272	0.0108338	0.0831234	5.25922	5.59731	2.85323	0.746308	0.0200538	0.110931	5.28508	34.1656	36.6088			r5	0.924251	0.526238	0.337494	0.659251	0.71894	0.23855	0.805129	0.44	0.17238	0.412096	0.341725	0.318635
r	shoot	87.5128	2.67254	0.320704	0.0356878	0.136056	3.61251	46.3785	2.21765	0.204011	0.0207233	0.0613486	4.21037	8.83996	9.68411			r25	0.975675	0.690683	0.41449	0.627328	0.617784	0.314962	0.910937	0.574802	0.368587	0.593673	0.373248	0.384206
r	shoot	71.0415	3.41663	0.321199	0.0332766	0.245571	5.28555	30.9496	2.06308	0.198932	0.0174142	0.0691023	5.41504	9.49513	11.2374			r25	0.910164	0.670213	0.316856	0.397017	0.710615	0.427055	0.826642	0.579223	0.201997	0.430986	0.361115	0.338595
r	shoot	68.3047	2.49062	0.237918	0.0224545	0.18883	7.28853	33.9409	2.52133	0.252443	0.01581	0.0668567	5.95613	10.4229	15.7072			r25	0.944442	0.630349	0.253544	0.442004	0.514896	0.522066	0.867243	0.487362	0.245462	0.478054	0.372913	0.343093
r	shoot	66.1516	1.87013	0.234156	0.0167922	0.113805	4.31727	42.1368	2.3192	0.385761	0.0237332	0.0655561	3.52828	13.7171	15.9892			r25	0.964204	0.499264	0.454837	0.631825	0.701061	0.355834	0.797699	0.452863	0.163801	0.41276	0.363085	0.364999
r5	root	7.01233	2.2403	0.729472	0.022937	0.0857693	5.71018	7.25389	2.72376	1.07196	0.0270705	0.119311	10.2943	31.2851	38.9536
r5	root	3.9162	1.55958	0.468894	0.0164662	0.072804	6.11052	10.994	3.37376	1.58551	0.0454586	0.150631	13.3216	28.0122	34.3098
r5	root	6.64053	2.42208	0.636182	0.0229345	0.0823148	5.92607	4.94952	2.41567	0.600007	0.0192037	0.0851132	7.91653	27.2872	30.7353
r5	root	7.26191	2.2857	0.73803	0.0288865	0.0812077	11.2641	10.1815	3	1.48149	0.0339332	0.131954	9.50206	25.133	42.9477
r5	shoot	97.9419	2.07445	0.44	0.0277121	0.22147	2.89393	34.9918	2.17526	0.265258	0.0305155	0.0505155	4.24845	15.6188	8.55093
r5	shoot	65.5479	2.37843	0.329944	0.0338202	0.193404	4.35966	45.9679	2.33786	0.205357	0.0204796	0.0725204	8.84692	9.59686	9.86401
r5	shoot	76.9869	2.19072	0.228026	0.0406074	0.168521	2.90291	44.9604	2.50784	0.246858	0.019041	0.0498613	4.52636	5.52389	12.7533
r5	shoot	88.6057	2.53887	0.375968	0.0558871	0.207726	3.52887	42.0657	2.35714	0.308571	0.0237857	0.0685	4.44357	6.61766	12.7616
r25	root	2.2657	1.47847	0.295851	0.00983548	0.070422	8.41366	5.15729	2.45312	0.546875	0.0163542	0.101562	7.40677	29.5899	32.8946
r25	root	9.05815	1.34173	1.15108	0.057554	0.0673861	5.92686	9.8725	2.51615	1.12183	0.0240653	0.0977749	8.25892	19.6741	45.8565
r25	root	4.53984	1.48548	0.748671	0.0352098	0.125124	9.0011	6.53928	2.77986	0.88	0.0227338	0.0913957	10.1416	20.9167	38.0782
r25	root	3.31393	1.86604	0.478439	0.0222455	0.0712822	6.63689	12.878	2.81084	1.26449	0.0349613	0.115763	8.83556	21.1568	35.579
r25	shoot	90.8767	3.30132	0.209437	0.0165563	0.113825	3.86838	52.749	3.31625	0.319239	0.0238946	0.0604832	4.62123	12.4439	13.1426
r25	shoot	91.7718	2.72674	0.533895	0.0378947	0.165474	4.41768	47.0761	3.46362	0.283966	0.0182277	0.0552651	4.22801	13.8593	15.325
r25	shoot	77.1742	2.53313	0.254297	0.0278906	0.132809	9.83227	42.7183	2.6428	0.286276	0.020822	0.0543508	5.29681	8.96909	13.5247
r25	shoot	89.2631	1.86055	0.399169	0.0381755	0.167169	3.66619	50.7794	2.32652	0.247699	0.0245736	0.065993	5.07868	10.2858	9.91563
	Description of experimental variants, parameters and units of measurements follows abbreviations presented in the main body of the manuscript.
	Datasheet 4. Raw data of elemental contents measured in the study and derived calculated parameters.
